1 **Impact of sequence variant detection and bacterial DNA extraction methods on the**  
2 **measurement of microbial community composition in human stool**

3

4 Riley Hughes<sup>1</sup>, Zeynep Alkan<sup>2</sup>, Nancy L. Keim<sup>1,2</sup> and Mary E. Kable<sup>1,2</sup>

5

6 **Affiliations:**

7 <sup>1</sup>University of California, Davis, Department of Nutrition, One Shields Ave., Davis, CA 95616,

8 USA

9 <sup>2</sup>USDA, Agricultural Research Service, Western Human Nutrition Research Center, Immunity

10 and Disease Prevention, 430 West Health Sciences Dr., Davis, CA, 95616, USA

11

12 **Corresponding Author:**

13 Mary E. Kable

14 mary.kable@ars.usda.gov

15 **ABSTRACT**

16 **Background:** The human gut microbiome has been widely studied in the context of human  
17 health and metabolism, however the question of how to analyze this community remains  
18 contentious. This study compares new and previously well established methods aimed at  
19 reducing bias in bioinformatics analysis (QIIME 1 and DADA2) and bacterial DNA extraction of  
20 human fecal samples in 16S rRNA marker gene surveys.

21 **Results:** Analysis of a mock DNA community using DADA2 identified more chimeras (QIIME  
22 1: 0.70% of total reads vs DADA2: 1.96%), fewer sequence variants , (QIIME 1:  $1297.4 \pm 98.88$   
23 vs. DADA2:  $136.27 \pm 11.35$ , mean  $\pm$  SD) and correct taxa at a higher resolution of classification  
24 (i.e. genus-level) than open reference OTU picking in QIIME 1. Additionally, the extraction of  
25 whole cell mock community bacterial DNA using four commercially available kits resulted in  
26 varying DNA yield, quality and bacterial community composition. Of the four kits compared,  
27 ZymoBIOMICS DNA Miniprep Kit provided the greatest yield, with a slight enrichment of  
28 *Enterococcus*. However, QIAamp Fast DNA Stool Mini Kit resulted in the highest DNA quality.  
29 Mo Bio PowerFecal DNA Kit had the most dramatic effect on the mock community  
30 composition, resulting in an increased proportion of members of the family *Enterobacteriaceae*  
31 and genus *Eshcerichia* as well as members of genera *Lactobacillus* and *Pseudomonas*. The  
32 presence of a sterile fecal matrix had a slight, but inconsistent effect on the yield, quality and  
33 taxa identified after extraction with all four DNA extraction kits. Extraction of bacterial DNA  
34 from native stool samples revealed a distinct effect of the DNA stabilization reagent DNA/RNA  
35 Shield on community composition, causing an increase in the detected abundance of members of  
36 orders *Bifidobacteriales*, *Bacteroidales*, *Turicibacterales*, *Clostridiales* and *Enterobacteriales*.

37 **Conclusion:** These results confirm that the DADA2 algorithm is superior to sequence clustering  
38 by similarity to determine microbial community structure. Additionally, commercially available  
39 kits used for bacterial DNA extraction from fecal samples have some effect on the proportion of  
40 high abundance members detected in a microbial community, but it is less significant than the  
41 effect of using DNA stabilization reagent, DNA/RNA Shield.

42

## 43 INTRODUCTION

44 Marker gene surveys utilizing PCR amplification of a short region of the bacterial 16S  
45 rRNA gene from bacterial DNA extracted from environmental samples are becoming  
46 increasingly affordable, leading to their ubiquitous implementation in nearly every aspect of  
47 biological sciences research [1-8]. However, this method can be heavily affected by technical  
48 bias, which is induced at each step in the experimental protocol required to generate marker gene  
49 data including; sample handling, bacterial DNA extraction, PCR amplification, sequencing and  
50 bioinformatics analysis [9, 10]. PCR conditions and primer choice can impact biases during the  
51 amplification process, which has downstream effects on library preparation and formation of  
52 chimeric sequences [11, 12]. However, the two most important sources of technical bias, which  
53 can be relatively easily controlled, in marker gene surveys are DNA extraction and  
54 bioinformatics analysis [13].

55 Clustering into operational taxonomic units (OTUs) has been one of the primary  
56 bioinformatic methods used to group and identify bacterial taxa in samples in metagenomics and  
57 marker gene based sequencing analyses. This method utilizes percent sequence similarity to  
58 group sequences into operational taxonomic units (OTUs). The common similarity threshold  
59 used to define these OTUs is 97%, which is based on a study showing that most strains have

60 97% 16S rRNA sequence similarity [14]. From each OTU cluster, a single sequence is selected  
61 as the “representative sequence” and is classified based on a reference database. All sequences  
62 within the OTU cluster are then given the same taxonomic classification. OTU clustering offers a  
63 computational benefit, reducing millions of reads into only thousands of OTUs, allowing for  
64 rapid analysis of datasets [15].

65 However, the OTU clustering method has long been understood to have a number of  
66 drawbacks [15]. For instance, percent sequence similarity can overestimate the evolutionary  
67 similarity between sequences, leading to inappropriate clustering of sequences. Additionally, the  
68 standard 97% sequence similarity used to define species is an approximation and varies between  
69 taxa [16]. Higher rate of false positives (i.e. identification of taxa not present in the sample) as  
70 well as poor sequence and taxonomic resolution have also been cited as issues with OTU  
71 clustering [17, 18]. With the development of a number of new algorithms for sequence variant  
72 identification including Devisive Amplicon Denoising Algorithm (DADA2), unoise2, minimum  
73 entropy decomposition and Deblur [19-23], additional criticisms have surfaced regarding the  
74 OTU clustering method [24, 25] and the need to conduct and publish independent direct  
75 comparisons of methods has arisen.

76 Before sequences can even be analyzed and results affected by OTU clustering vs.  
77 sequence variant detection, DNA extraction methods can heavily influence the proportion of  
78 bacterial taxa detected in an environmental sample. Previous studies investigating the impact of  
79 various DNA extraction methods on 16S rRNA analyses of stool microbial communities each  
80 lack the combined use of a mock community in the relevant stool matrix background.  
81 Additionally, the number of optimizable steps in DNA extraction protocols results in a near  
82 infinite number of possible ways to execute this type of experiment. Most notably, previous

83 efforts to compare DNA extraction methods have indicated that the bead beating protocol tends  
84 to be the source of greatest variation between kits [26-28], yet few if any have held this variable  
85 constant during comparison. Finally, as technology evolves, new DNA extraction kits and  
86 bioinformatics methods are constantly being developed. Therefore, the need to compare and  
87 analyze new methods remains.

88 In this study we perform two important comparisons. First, we examine DADA2's core  
89 denoising algorithm relative to the open reference OTU clustering method used in QIIME 1 to  
90 confirm which method results in a more accurate classification of the taxa present in a predefined  
91 mock community of bacteria. Second, we use a whole cell mock community in a sterile feces  
92 background to compare four relevant DNA extraction methods [10, 13, 29] with standardized  
93 speed and duration of bead beating.

94

## 95 **METHODS**

### 96 **Preparation of stool samples**

97 Whole stool samples were collected at home by three human subjects, placed in a cooler  
98 containing ice and brought to the Western Human Nutrition Research Center within 12 h of  
99 generation. Upon arrival at the facility, each sample was stored briefly at 4°C until it could be  
100 homogenized in a stomacher for three minutes and flash frozen on dry ice. These samples were  
101 thawed, combined in equal amounts, mixed, and then divided into 2 pools. The first pool, which  
102 will be referred to as “native stool”, contained 1 g of stool from each subject, combined by  
103 homogenization in a stomacher twice for 5 min. A portion of this 3 g mixture was set aside in  
104 100 mg aliquots for DNA extraction. The remaining 1 g of the mixture was combined with 9 mL  
105 of nucleotide stabilization reagent (DNA/RNA Shield, Zymo Research, Irvine, CA) by vortexing

106 and incubated at room temperature overnight before 250 mg aliquots were weighed out for DNA  
107 extraction.

108 A “sterile” fecal sample was prepared as previously described [30] from the second pool,  
109 which contained 3 g of stool from each subject. Briefly, the 9 g mixture was stirred together with  
110 90 mL of boiling 30% hydrogen peroxide (H<sub>2</sub>O<sub>2</sub>) for 15 min. The boiled stool mixture was then  
111 passed over a 0.22 µm vacuum filter (Sarstedt, Nümbrecht, Germany) to collect particulate  
112 matter. Fecal particulate matter retained on the filter was then washed with sterile phosphate  
113 buffered saline (DPBS, pH=7.0-7.3, ThermoFisher, Waltham, MA) in 100 mL batches until  
114 H<sub>2</sub>O<sub>2</sub> was no longer detected in the filtrate using detection strips (MQuant Peroxide Test,  
115 MilliporeSigma, St. Louis, MO). This required 1 L of PBS. A total of 3.1 g of dry particulate  
116 matter was collected from the filter surface and suspended in 4.5 mL sterile PBS to create a  
117 sterile fecal matrix. To create a mock stool sample with a known bacterial community, a 1.5g  
118 aliquot of this sterile feces was homogenized in a stomacher for 2 min together with 1.125 mL of  
119 commercially available whole cell mock community (ZymoBIOMICS Microbial Community  
120 Standard, Zymo Research, Irvine, CA, lot number ZRC183430) and this mixture was set aside in  
121 173 mg aliquots for DNA extraction (75 µL of mock community per 100 mg of stool). The  
122 microbial strains included in the standard along with their theoretical relative abundances are  
123 listed in Table S1. The remainder of the sterile fecal matrix was portioned into 100 mg aliquots  
124 as blank controls for DNA extraction.

125

## 126 **Experimental design and bacterial DNA extraction**

127 A total of six sample types were prepared for DNA extraction; (1) kit blank with no  
128 sample, (2) 75 µL mock community alone, (3) 100 mg sterile feces alone, (4) sterile feces with

129 mock community added totaling 173 mg as described above, (5) 100 mg native stool and (6) 25  
130 mg native stool suspended in nucleotide stabilization reagent (DNA/RNA Shield, Zymo  
131 Research, Irvine, CA) totaling 250 mg. Twelve aliquots of each sample type (three per kit) were  
132 homogenized 5 times in bead tubes from three of the DNA extraction kits or bead tubes prepared  
133 separately (described below) at 6.5 m/s for 1 min using a homogenizer (FastPrep-24 Classic  
134 Instrument, MP Biomedicals). Samples were rested on ice for three minutes between each  
135 shaking interval. Bacterial DNA was then extracted using (1) QIAamp Fast DNA Stool Mini Kit,  
136 (2) MO BIO PowerFecal DNA Kit, (3) ZR Fecal DNA Kit and (4) ZymoBIOMICS DNA  
137 Miniprep Kit. For the QIAamp Fast DNA Stool Mini Kit, which contains no bead tubes, sterile 2  
138 mL screw cap tubes containing 300 mg of 0.1 mm diameter zirconia/silica beads (BioSpec  
139 Products, Bartlesville, OK) were prepared separately and sterilized by autoclaving. After  
140 homogenization by bead beating, the manufacturer's protocol was followed for each kit with the  
141 following exceptions:

142 *All kits* - Wash and elution buffers were incubated on the column for 10 min prior to  
143 centrifugation. Before the addition of elution buffer, columns were centrifuged for three minutes  
144 with caps open in order to completely remove wash buffers.

145 *QIAamp Fast DNA Stool Mini Kit* – The protocol for “Isolation of DNA from Stool for  
146 Pathogen Detection” in the QIAamp Fast DNA Stool Mini Handbook (03/2014) was used with  
147 few modifications. Briefly, after bead-beating stool samples in 1 mL InhibitEx buffer, the  
148 samples were heated at 95°C for 5 minutes. Centrifugation to remove particulate matter was  
149 performed for 3 min on the whole sample and for an additional 3 min on the resulting  
150 supernatant. A larger portion than recommended, 400 µL, of the clarified sample was transferred  
151 to a new tube containing 30 µL proteinase K. Additional lysis was performed as described in the

152 manufacturer's protocol. However, only 200  $\mu$ L of lysate was added to the QIAamp spin  
153 column. DNA was eluted with 30  $\mu$ L buffer ATE.

154 *MO BIO (now QIAamp) PowerFecal DNA Kit* – DNA was eluted with 50  $\mu$ L buffer C6.

155 *ZR Fecal DNA Kit (now Quick-DNA Fecal/Soil Microbe Miniprep Kit)* – DNA was  
156 eluted in 50  $\mu$ L DNase free water.

157 *ZymoBIOMICS DNA Miniprep Kit* – DNA was eluted in 50  $\mu$ L DNase free water.

158

### 159 **Amplification and sequencing of 16S rRNA**

160 The 16S rRNA V4 region was amplified as previously described [31] using primers F515  
161 and R806 [32]. A unique eight nucleotide Hamming code sequence was included on the 5' end  
162 of F515 [33, 34] for amplification of each sample. Each 50  $\mu$ L reaction mixture was composed  
163 of 20 ng of template DNA, 1.5 U Ex Taq DNA polymerase (TaKaRa, Otsu, Japan), 100 nM of  
164 forward primer, 100 nM reverse primer, 500 nM magnesium chloride, 200 nM dNTPs and 1X Ex  
165 Taq buffer. Amplification was performed in triplicate for each sample with one cycle at 94°C for  
166 3 min followed by 25 cycles of 94°C for 45 s, 50°C for 60 s, and 72°C for 60 s. A final extension  
167 step was performed at 72°C for 10 min. Equal volumes of each PCR reaction (40  $\mu$ L) were  
168 pooled and gel purified with the Wizard SV Gel and PCR cleanup system (Promega, Madison,  
169 WI). Ligation of NEXTflex adapters (Bioo Scientific, Austin, TX) and 300-bp paired end  
170 sequencing on an Illumina MiSeq instrument with MiSeq Reagent Kit v3 (Illumina) was  
171 performed at the University of California, Davis (<http://dnatech.genomecenter.ucdavis.edu/>).

172 In order to eliminate the bias introduced by PCR amplification and sequencing from our  
173 downstream analyses, a commercially available mock microbial community DNA standard  
174 (ZymoBIOMICS™ Microbial Community DNA Standard, lot number ZRC187324), a sample



175 which we will refer to as Mock DNA was amplified and sequenced in the same manner as all  
176 other experimental samples. The DNA standard is a mixture of genomic DNA extracted and  
177 quantified from pure cultures of eight bacterial and two fungal strains with the same theoretical  
178 composition as the whole cell mock community described above. Metagenomic sequencing, was  
179 performed by Zymo Research as part of their product quality assesment to determine the percent  
180 relative abundance of the microbial strains in both the DNA and whole cell standards. Their  
181 reported results are listed in Table S1.

182

### 183 **16S rRNA gene sequence analysis**

184 A summary of the methods used for analysis is described in Table 1. FASTQ files were  
185 analyzed using QIIME version 1.9.1 [35], which will hereafter be referred to as QIIME 1, or  
186 DADA2 version 1.4.0 [20]. R version 3.4.0 was used for all analyses. For the QIIME 1 analysis,  
187 referred to throughout this manuscript, barcodes were extracted and the `split_libraries_fastq.py`  
188 script was used for demultiplexing and quality filtering. Demultiplexing was performed only  
189 with barcodes containing no sequencing errors, and quality filtering was performed at a Phred  
190 quality threshold of 29. Chimeric sequences were identified with `identify_chimeric_seqs.py`  
191 using `usearch` [36] and removed. The remaining DNA sequences were grouped into OTUs with  
192 97% matched sequence identity by the use of `pick_open_reference_otus.py`. The default for open  
193 reference OTU picking in QIIME is to use the first read as the representative sequence to form  
194 the OTU clusters. In order to more closely imitate the DADA2 pipeline, this default behavior  
195 was changed to use the most abundant sequence by passing a parameter file using the function  
196 `pick_rep_set.py` (method `most_abundant`). Otherwise default parameters were used. Greengenes

197 13.8 was used as the reference database [37] for chimera checking, OTU picking, and taxonomy  
 198 assignment.

199

200 **Table 1.** Summary of bioinformatic methods

| Step               | DADA2 1.4.0                                                                        | QIIME 1.9.1                                                                                                                      |
|--------------------|------------------------------------------------------------------------------------|----------------------------------------------------------------------------------------------------------------------------------|
| Input              | demultiplexed fastq files + mapping file                                           | fastq files + mapping file                                                                                                       |
| Pre-Processing     | - Filter and trim (truncLen=190, otherwise standard parameters)<br>- Dereplication | - Extract barcodes and remove primers<br>- Split libraries (demultiplex and quality filter – Q=29, otherwise default parameters) |
| Pick OTUs/variants | Sequence-variant inference (Sample inference/Denoising)                            | Open reference OTU picking (usearch, pick_rep_set method most_abundant, otherwise default parameters)                            |
| Remove chimeras    | Remove bimeras                                                                     | Remove chimeras* (usearch)                                                                                                       |
| Assign taxonomy    | Greengenes v13_8_99                                                                | Greengenes v13_8_99                                                                                                              |

201 \*Chimera/bimera removal comes before OTU picking in QIIME 1 but after Sample Inference in  
 202 DADA2  
 203

204 DADA2’s denoising algorithm is based on pairwise comparison of sequences and uses  
 205 quality scores of the reads as well as the probability of various copy errors (transition  
 206 probabilities) that could be introduced during replication and sequencing. See Callahan et al. [20]  
 207 for full documentation of the core DADA2 algorithm. Methods used for DADA2 analysis were  
 208 adapted from the DADA2 Pipeline Tutorial (1.4) and DADA2 Frequently Asked Questions,  
 209 which are both currently available in the DADA2 GitHub documentation. Briefly, prior to  
 210 analyses in DADA2, samples were demultiplexed using the QIIME 1.9.1 `split_libraries_fastq.py`  
 211 script with the following modifications from default parameters: `-r` (max bad run length) 999, `-n`  
 212 (max length of sequence) 999, `-q` (Phred quality threshold) 0, `-p` (min number of high quality  
 213 bases as fraction of read length) 0.0001 and `--store_demultiplexed_fastq`. This removed the  
 214 majority of quality filtering that is typically implemented by the QIIME 1 pipeline using this

215 script and created individual fastq files for each sample. The demultiplexed files were used as the  
216 input for DADA2.

217       Quality profiles of the reads were analyzed using the DADA2 function,  
218 `plotQualityProfile`, to determine positions at which read quality greatly diminished. Reads were  
219 then filtered and trimmed at the identified positions (`truncLen=190`) using the `filterAndTrim`  
220 function with standard parameters (`maxN=0`, `truncQ=2`, and `maxEE=2`). Dereplication was then  
221 used to identify all unique sequences present in the data set and determine the abundance of each  
222 sequence. DADA2 also retains a summary of the quality information associated with each unique  
223 sequence, using this to inform the error model of the subsequent denoising step, increasing its  
224 accuracy [20]. DADA2's error model automatically filters out singletons, removing them before  
225 the subsequent sample inference step. Quality of the error estimation was then visualized using  
226 the `plotErrors` function to ensure good fit. Sample inference was performed using the inferred  
227 error model and chimeric sequences were removed using the `removeBimeraDenovo` function. It  
228 is relevant to note that DADA2 implements bimera removal after sample inference has been  
229 performed, whereas removal of chimeras in QIIME 1 occurs before the OTU picking step. The  
230 Greengenes 13.8 database was used to assign taxonomy using the `assignTaxonomy` function.

231

## 232 **Statistical Analysis**

233       OTU or sequence variant counts and rarefaction curves were determined on sequence  
234 count files (referred to as sequence table and OTU table in DADA2 and QIIME 1 respectively)  
235 generated by each analysis pipeline. These were determined using a count of the number of rows  
236 in each output file that contained non-zero values, referred to as non-zero OTU/SV counts, for  
237 each sample.

238 Analysis of the relative proportion of each bacterial taxa was made after the data were  
239 rarefied at a sequencing depth of 50,000 sequences per sample for both QIIME 1 and DADA2.  
240 The rarefied sequence variant counts were summed by taxonomic identification and differential  
241 abundances between experimental groups were determined using LefSe [38]. This method  
242 involves the Kruskal-Wallis (KW) sum-rank test between classes of data followed by (unpaired)  
243 Wilcoxon rank-sum test to conduct pairwise tests among subclasses. LDA is then used to  
244 estimate the effect size for each of the identified taxa. We used LefSe (Galaxy Version 1.0) with  
245 default parameters ( $\alpha$  KW = 0.05;  $\alpha$  Wilcoxon = 0.05; LDA score threshold = 2.0) as well as using  
246 the all-against-all strategy for multi-class analysis. All other comparisons were made using either  
247 Welch's t-test or Kruskal-Wallis (KW).

248

## 249 **RESULTS**

### 250 **The DADA2 denoising algorithm improves accuracy of bacterial community measurement.**

251 QIIME 1 and DADA2 were compared using 18,651,434 sequences generated by Illumina  
252 MiSeq sequencing of 6 individual PCR amplifications of a microbial community DNA standard  
253 (Mock DNA). After demultiplexing and quality filtering using QIIME 1, 790,502 total sequences  
254 remained. Of these, 5,532 chimeras were identified using usearch, accounting for only 0.70% of  
255 total sequences. On the other hand, the trimming, denoising and dereplication steps of DADA2  
256 resulted in 368 sequences (or inferred variants), which could be considered more equivalent to a  
257 representative set of sequences picked by open reference OTU picking. Out of these sequences,  
258 160 bimeras were identified, representing 43.48% of inferred variants, but only 1.96% of total  
259 reads after dereplication, and filtering (1,354,268 reads), which is still nearly double the  
260 percentage detected using usearch in QIIME 1.

261           QIIME 1 identified a much larger number of OTUs/SVs than DADA2 in Mock DNA  
262 (QIIME 1:  $1145.5 \pm 68.73$  vs. DADA2:  $123.5 \pm 8.12$ , mean  $\pm$  SD) (**Figure 1A**). However,  
263 DADA2 still greatly overestimated the number of non-zero variants relative to the expected  
264 number of bacterial species present in the Mock DNA samples. Low abundance sequences  
265 identified by DADA2 were investigated further. The Hamming distance of low abundant  
266 sequences relative to more abundant sequence-variants they were split from fell in a range from  
267 1 to 80, and quality scores at nucleotide positions used to determine a particular low abundance  
268 sequence was unique relative to the more abundant sequence it was split away from were above  
269 29. However, when BLAST was used to compare these low abundance sequences to those  
270 available in the National Center for Biotechnology Information (NCBI) nucleotide database,  
271 87% of unique sequences in the Mock DNA samples were exact matches (100% query cover,  
272 100% identity) to bacterial taxa that tend to be abundant in human stool samples, such as genera  
273 *Bifidobacterium*, *Turicibacter*, and *Blautia*.

274           Rarefaction curves representing the discovery rate of unique sequences, potentially  
275 attributed to new taxonomic units, as a function of sequencing effort (i.e. number of sequences)  
276 [39], reflected the differences in non-zero OTU/SV counts between QIIME 1 and DADA2  
277 (**Figure 1B and C**). As sequencing effort increases, QIIME 1 open reference OTU clustering  
278 results in the detection of continually increasing numbers of unique sequences in Mock DNA  
279 samples. However, the number of unique sequences detected by DADA2 does not increase with  
280 sequencing effort in the same way as for QIIME 1, instead the number of unique sequences  
281 detected levels out at approximately 50,000 sequences per sample.

282           While QIIME 1 identified many more OTUs/SVs than DADA2, rarefaction at 50,000  
283 sequences per sample followed by removal of low abundance taxa (<1%) into a category termed

284 “Other”, showed a similar taxonomic profile of the Mock DNA samples detected by both QIIME  
285 1 and DADA2 (**Figure 2**). However, DADA2 identified correct taxa at a higher resolution of  
286 classification (i.e. genus-level) with less redundancy (i.e. identification of the same taxa at  
287 different levels of taxonomic classification, such as f\_*Bacillaceae* and g\_*Bacillus*) than QIIME 1.  
288 More specifically, eight taxa were present at greater than 1% relative abundance as detected by  
289 DADA2. Seven out of these eight were correctly identified to the genus level. The last variant  
290 was correctly identified at the family level (e.g. f\_*Enterobacteriaceae* includes *Salmonella*  
291 *enterica*). QIIME 1 identified nine taxa present at greater than 1% relative abundance. Out of  
292 these nine, four were redundant at different levels of phylogenetic resolution. These included  
293 f\_*Bacillaceae* and g\_*Bacillus* as well as f\_*Pseudomonadaceae* and g\_*Pseudomonas*. All  
294 nine taxa identified were present in the Mock DNA community (no spurious identification), but  
295 two taxa remained classified only to the family level (f\_*Enterobacteriaceae* and  
296 f\_*Listeriaceae*) (**Figure 2**). LefSe analysis showed significant differences in the majority of  
297 taxa identified excluding only g\_*Enterococcus* and g\_*Staphylococcus*. Because of this  
298 increased accuracy in taxonomic identification, the remainder of comparisons examining DNA  
299 extraction kits were analyzed using DADA2.

300

### 301 **DNA yield and quality vary among extraction kits.**

302 The efficiency of four commercial DNA extraction kits was assessed using commercially  
303 available whole cell mock community (Mock Community) and the whole cell mock community  
304 spiked into sterilized fecal matrix (Mock Community in Sterilized Feces). There was a  
305 significant difference among the kits in DNA yield (KW Mock Community  $P = 0.02488$ , Mock  
306 Community in Sterilized Feces  $P = 0.01556$ ) and quality (KW Mock Community  $p = 0.03781$ ,

307 Mock Community in Sterilized Feces  $P = 0.04358$ ) from both sample types. ZR Fecal and  
308 ZymoBIOMICS delivered the highest quantity of DNA for both the whole cell Mock  
309 Community alone (ZR Fecal average = 59.3 ng/uL, ZymoBIOMICS average = 58.8 ng/uL) and  
310 Mock Community in Sterile Feces (ZR Fecal average = 39.9ng/uL, ZymoBIOMICS average =  
311 31.8 ng/uL). However, QIAamp delivered the highest quality DNA from both sample types  
312 ( $A_{260}/A_{280} = 2.5$  and 1.86 respectively) (**Figure. 3A and B**). The DNA yield and quality were  
313 also affected by the presence of the sterile feces matrix. Both decreased in the presence of the  
314 matrix for each kit, except for QIAamp. However, the difference in yield was only significant in  
315 the ZR Fecal (Welch's t-test  $P = 0.02699$ ) and ZymoBIOMICS ( $P = 0.008911$ ) kits and the  
316 difference in quality was only significant in the ZR Fecal kit ( $P = 0.03097$ ).

317 The yield obtained from blank samples followed the same trend as the yield obtained  
318 from mock community samples. It was significantly higher for ZR Fecal and ZymoBIOMICS  
319 than it was for the other two protocols, reaching levels greater than 10 ng/uL for each of the two  
320 kits. However, the number of bacterial sequences detected after PCR and sequencing in the  
321 blanks were not significantly different among kits (**Figure 3C**, KW Blank p-value = 0.09234).

322

### 323 **Measurement of bacterial community composition is affected by DNA extraction protocol.**

324 In addition to DNA yield and quality, the proportion of bacterial taxa measured after  
325 extraction with each kit was determined. The relative proportions of taxa expected to most  
326 closely represent reality were determined using the Mock DNA standard described above.  
327 Weighted UniFrac distances between extracted samples and the Mock DNA samples were  
328 visualized by principal components analysis (**Figure 4A**) and summarized in boxplots (**Figure**  
329 **4B**). Samples extracted with the Mo Bio kit had the greatest combined distance from Mock DNA

330 (mean=0.0429, median=0.0409) compared to the other kits (Mo Bio mean = 0.0107, median =  
331 0.0121; ZymoBIOMICS mean = 0.0039, median = 0.0034; ZR Fecal mean = 0.0097, median =  
332 0.0078). Distances were significantly affected by the presence of a sterile fecal matrix in all kits  
333 examined (Mo Bio  $P = 1.36e-05$ ; QIAamp  $P < 2.2e-16$ ; ZymoBIOMICS  $P = 1.887e-6$ ; ZR Fecal  
334  $P = 0.0131$ ). In the case of the Mo Bio and ZR Fecal kits, the presence of a stool matrix  
335 decreased the distance from Mock DNA (Mo Bio mean with matrix = 0.0378, mean without  
336 matrix = 0.0479; ZR Fecal mean with matrix = 0.0078, mean without matrix = 0.0117).  
337 However, the opposite phenomenon occurred for the Qiagen kit protocol (mean with matrix =  
338 0.0162, mean without matrix = 0.0053) and the ZymoBIOMICS kit (mean with matrix = 0.0064,  
339 mean without matrix = 0.0039).

340 LefSe analysis identified the greatest number of significantly different taxa in Mock  
341 community samples extracted with the Mo Bio kit. This included an increased proportion of  
342 members of the family *Enterobacteriaceae* and genus *Eshcerichia* as well as members of genera  
343 *Lactobacillus* and *Pseudomonas* (Figure. 5). Mo Bio also enriched the “Other” category,  
344 indicating enrichment in several other low abundance taxa. Relative to the Mock DNA,  
345 decreased abundance of members of the phylum *Firmicutes*, including order *Bacillales* and class  
346 *Bacilli* and genus *Listeria*, though not genus *Bacillus* were detected in all extracted samples.  
347 Members of the gram positive genus *Staphylococcus* were also proportionally decreased in the  
348 extracted samples relative to Mock DNA. Mock community samples extracted by  
349 ZymoBIOMICS showed significant enrichment of genus *Enterococcus*.

350

351 **Use of nucleotide stabilization reagent significantly affects measurement of microbial**  
352 **community composition.**



353           After assessing the performance of different pipelines and extraction kits on the mock  
354 community, we looked to confirm the relative efficiency of each kit and further investigate the  
355 effect of the nucleotide stabilization reagent, DNA/RNA Shield, using a representative pool of  
356 natural or native stool samples (Native Stool and Native Stool with DNA/RNA Shield). DNA  
357 yield was significantly different among kits for extraction from pooled native stool samples  
358 similar to observations for the mock community samples above (KW p-value = 0.0329 native  
359 stool; 0.01556 native stool in shield). Additionally, the presence of stabilization reagent affected  
360 the amount of DNA recovered by each kit. For both kits from Zymo Research (ZR Fecal and  
361 ZymoBIOMICS), the amount of DNA recovered per gram of stool was significantly increased  
362 (p-value = 0.0002916 and 0.01315) in the presence of stabilization reagent (**Figure 6A**). This  
363 was not true for the other two protocols which showed a decrease. Although, the decrease was  
364 only significant for the QIAamp kit (p-value = 0.003795). The quality of DNA recovered was  
365 also significantly different among kits for extraction of the Native Stool and Native Stool with  
366 DNA/RNA Shield (KW p-value = 0.02871; 0.01879), with QIAamp again providing the highest  
367 quality DNA (**Figure 6B**). However, the quality of DNA was only significantly affected by the  
368 presence of DNA/RNA Shield during extraction with the Mo Bio PowerFecal Kit (p-value =  
369 6.435e-05).

370           Principal coordinate analysis of weighted UniFrac distances showed that samples  
371 clustered by stabilization reagent first and by DNA extraction method second (**Figure 7A and**  
372 **B**). The impact of stabilization reagent on community composition was again greatest for the Mo  
373 Bio kit (**Figure 7C**). However, analysis of the relative abundance of bacterial taxa present after  
374 extraction with each kit showed significant differences in relative proportion of taxa enriched  
375 between samples with and without DNA/RNA Shield across all extraction kits (**Figure. 8**) Order

376 *Clostridiales* including family *Ruminococcaceae* and genera *Clostridium*, *Oscillospira*,  
377 *Ruminococcus*, and *SMB53* as well as order *Bifidobacteriales* including genus *Bifidobacterium*  
378 were significantly increased in native stool with DNA/RNA Shield. Order *Bacteroidales*  
379 including families *Rikenellaceae* and *Porphyromonadaceae* and genera *Bacteroides* and  
380 *Parabacteroides*; order *Turicibacterales* including genus *Turicibacter*; and order  
381 *Enterobacteriales* including genus *Escherichia* were also enriched in samples with DNA/RNA  
382 Shield. While not significant at the order level, other members of *Firmicutes* and *Actinobacteria*,  
383 including genera *Dorea*, *Faecalibacterium*, *Eggerthella*, *Roseburia*, *Collinsella*, *Coprococcus*,  
384 and *Blautia* were decreased in the presence of stabilization reagent.

385

## 386 **DISCUSSION**

387 The determination of microbial community structure composition in environmental  
388 samples can be heavily affected by technical bias. As new methods are developed to deal with  
389 errors induced by DNA extraction, sequencing and other analysis methods, it remains necessary  
390 to empirically compare and validate each method using microbial standards. Here we have  
391 shown that DADA2 provides a more accurate assessment of the microbial community both in  
392 terms of the number of sequence-variants detected as well as the identity and phylogenetic  
393 resolution of taxa present. Additionally, if bead beating speed and duration are held constant, the  
394 commercially available kit used for bacterial DNA extraction from fecal samples has minimal  
395 effects on the proportion of high abundance members detected in a microbial community, except  
396 in the case of chemical incompatibility, which may be present between the Mo Bio kit and the  
397 DNA stabilization reagent, DNA/RNA Shield.

398           The reduced number of unique sequences, identifiable to a higher taxonomic resolution  
399 detected using DADA2 relative to the QIIME 1 OTU clustering method was likely due to the  
400 method of error detection employed by DADA2, which statistically determines the most likely  
401 sequencing errors in a particular data set and then adjusts for them rather than rounding out by an  
402 allowable percent error (typically 97%). However, a number of low abundant taxa were also  
403 identified using DADA2 that were not present in the reference sequences for the mock  
404 community used for analysis. It should be noted that these taxa were detected without a stringent  
405 quality filter setting applied to the filterAndTrim function in DADA2. Therefore, it is possible  
406 that their number could be reduced further with a more stringent quality filter setting.  
407 Optimization parameters aside, many of these taxa were abundant in DNA that was extracted  
408 from native stool samples at the same time as the mock community samples in this study. This  
409 indicates that some contamination of the Mock DNA sample occurred leading to a slightly  
410 greater number of detected sequence variants than we expected. However, because the same  
411 samples were analyzed using both pipelines, our conclusions regarding the improved accuracy of  
412 DADA2 remain valid.

413           Subsequent to the selection of a bioinformatics pipeline for our analyses, we found that  
414 DNA yield and quality varied among mock community samples and blanks from four  
415 commercially available DNA extraction kits. Given that the number of bacterial sequences  
416 detected in Zymo Research blanks were not significantly higher than in the other kits, it is  
417 unclear why the DNA yield was high in blank samples extracted using these two kits. We  
418 suppose that either, the chemistry involved in the Zymo Research kits results in absorbance at  
419 A260, or that there is viral or fungal DNA contaminant in the kit, which was undetected by our  
420 PCR protocol.

421           Within all four, both yield and quality were slightly impacted by the presence of sterile  
422 fecal matrix. The trend for a reduction in yield in the presence of matrix in three out of the four  
423 kits suggests that, as expected, the presence of physical impediments to bead-beating that tend to  
424 be present in the stool matrix, primarily undigested food particles, likely inhibit the effectiveness  
425 of the beads in disrupting bacterial cells [41, 42]. One exception was the QIAamp kit. However,  
426 the composition of the microbial community in the context of sterile fecal matrix was more  
427 dissimilar than mock community alone from the proportions predicted by our control. This did  
428 not result in a significantly detectable change in the relative proportions of abundant taxa, but  
429 insignificant increases in gram negative organisms and decreases in proportions of some gram  
430 positive organisms were observed. This would be expected if decreased efficiency of bacterial  
431 cell wall disruption by bead-beating occurred in the presence of the sterile fecal matrix. The Mo  
432 Bio kit, on the other hand, displayed decreased yield in the presence of sterile fecal matrix, but  
433 the microbial community composition tended to become more similar to the control than mock  
434 community along. The garnet beads included in the Mo Bio kit were pulverized at the speed and  
435 duration of shaking used in our protocol (see materials and methods). It is therefore possible that  
436 the very small broken particles of these beads disrupted bacterial cells so effectively that exposed  
437 DNA was also pulverized and the presence of a fecal matrix helped prevent some of this  
438 disruption.

439           Given that speed and duration of bead beating were held constant, the trends described  
440 for yield and quality across the four extraction kits in the presence of sterile fecal matrix suggest  
441 that the size, shape and composition of beads play role in the ability to sufficiently disrupt the  
442 stool matrix and facilitate the detection of “realistic” proportions of bacterial taxa. A second  
443 explanation for varying results across the kits, predominated by a slight decrease in nucleotide

444 quality, in the presence of the sterile fecal matrix might be PCR inhibitors, such as  
445 carbohydrates, coming from the stool matrix, which are eliminated to differing degrees of  
446 completeness by each kit and could also be affected by use of stabilization or preservation  
447 reagent [43].

448 All four DNA extraction protocols showed a decreased relative abundance of the phylum  
449 *Firmicutes* and genus *Staphylococcus* extracted from whole cell mock community relative to the  
450 Mock DNA control sample. This may indicate that even the robust bead beating protocol used in  
451 this study (see Methods) was not sufficient to fully lyse all gram positive organisms contained in  
452 the stool samples. However, as shown in Table S1, the relative abundances of taxa in the whole  
453 cell mock community, as estimated by Zymo Research using metagenomics sequencing, differed  
454 from that in the Mock DNA. It is possible that the difference, reported by Zymo, was caused by  
455 biases introduced by the DNA extraction kit that they used to determine the abundance of their  
456 own community. Therefore, we are unable to use the difference between the “measured” values  
457 as the expected difference between the Mock DNA and mock microbial community samples as  
458 this would simply be a comparison of their extraction and sequencing methods and our own.  
459 Given that both sample types were prepared with the same theoretical proportions, our analysis  
460 presumes that the Mock DNA is a close representation of the proportions in the whole cell mock  
461 community. Under this assumption, the ZymoBIOMICS DNA Miniprep Kit was determined to  
462 provide the closest representation of the “true” microbial community in a stool sample. On the  
463 other hand, the Mo Bio kit had the most distinct deviation from the expected microbial  
464 community composition. In the mock microbial community, characterized by significant  
465 increases in *Lactobacillus* and several gram negative organisms relative to the Mock DNA  
466 control.

467           A native stool sample was used to determine the effect of DNA stabilization reagent on  
468 the overall microbial community composition. An additional element contributing to the  
469 differential community composition observed using the Mo Bio kit may be explained by  
470 analyses which showed that native stool samples were most dramatically affected by the  
471 presence of nucleotide stabilization reagent when extracted with Mo Bio. This indicates a  
472 potential incompatibility of the Mo Bio kit with the DNA/RNA Shield stabilization reagent,  
473 which was also used to stabilize the commercially available Mock Microbial Community. This  
474 putative chemical incompatibility may have affected the microbial community composition  
475 observed in all DNA/RNA Shield-suspended samples extracted using the Mo Bio kit. This  
476 includes the whole cell mock community samples, which are available only suspended in  
477 DNA/RNA Shield. On the other hand, the increase in DNA yield per gram of stool in the  
478 presence of stabilization reagent used together with the Zymo Research kits is perhaps  
479 unsurprising because all components were manufactured by Zymo Research and were likely  
480 optimized to be used together. However, we have shown that the stabilization reagent can also  
481 be used successfully with the QIAamp kit. Although there is a decrease in yield, the reagent  
482 does not cause a decrease in the DNA quality. It should be noted, however, that our analyses  
483 show the use of DNA/RNA Shield, alters the observed abundance of numerous taxa compared  
484 to native stool and this should be taken into consideration when planning studies and comparing  
485 results from studies which differ in their use of stabilization reagent.

486           Development of best practices and standardized methods for microbiota analysis is  
487 critical for the advancement of research in many fields including personalized nutrition, ecology,  
488 and food science/safety. It will be necessary to perform similar experiments as new technologies

489 are developed in order to make informed choices when determining which methods will provide  
490 the most accurate data.

491

## 492 **FIGURE LEGENDS**

493 **Figure 1. Variant counts resulting from QIIME 1 and DADA2 analyses.** A) Boxplot of  
494 comparison between DADA2 and QIIME 1 OTU/sequence variant counts for Mock DNA. B)  
495 Rarefaction curves showing differences in taxonomic discovery rate between DADA2 and  
496 QIIME 1. Six individually amplified and sequenced Mock DNA samples were analyzed with  
497 each pipeline.

498

499 **Figure 2. Relative taxonomic abundance of Mock Community DNA samples analyzed by**  
500 **DADA2 and QIIME 1.** OTU and sequence variant counts were rarefied at 50,000 sequences per  
501 sample for both groups. All taxa present at <1% abundance were grouped into the “Other”  
502 category. Each bar represents six PCR amplifications of Mock DNA. +Significantly enriched in  
503 DADA2 analyzed samples. \*Significantly enriched in QIIME 1 analyzed samples.

504

505 **Figure 3. Yield and quality of mock community DNA extracted by four commercial kits.**  
506 Boxplots showing A) DNA yield (ng/uL), B) DNA quality (A260/A280) and C) raw sequence  
507 counts obtained from whole cell mock community (Mock Community) or whole cell mock  
508 community spiked into a sterile feces matrix (Mock Comm in Sterile Feces), sterile feces alone  
509 (Sterile Feces) or no sample (Kit Blank) using each of four commercial DNA extraction kits  
510 (MoBio, Qiagen, ZRFecal and ZymoBIOMICS). Three of each sample type are represented.

511

512 **Figure 4. Weighted UniFrac of distance between extracted mock community samples and**

513 **Mock DNA.** A) Principal coordinate analysis of weighted UniFrac distances among Mock

514 Community or Mock Community in Sterile Feces and Mock DNA (control) samples. B)

515 Boxplots summarizing the weighted UniFrac distance between Mock DNA and each extracted

516 sample type grouped by extraction kit (Mo Bio, QIAamp, ZR Fecal and ZymoBIOMICS).

517

518 **Figure 5. Relative taxonomic abundance of mock community taxa after extraction by four**

519 **commercial kits.** The proportions of taxa present in the Mock DNA sample are shown for

520 comparison (None). Each bar represents a summary of technical replicates (six Mock DNA

521 samples and three of each of the other sample types). MC is used to designate whole cell mock

522 community only and SF is used to designate mock community spiked into sterile feces matrix.

523 +Significantly enriched in Mock DNA samples. \*Significantly enriched in extracted samples.

524

525 **Figure 6. Yield and quality of pooled native stool bacterial community DNA extracted by**

526 **four commercial kits.** Boxplots showing A) DNA yield in ng/g of stool and B) quality

527 (A260/A280) obtained from pooled (three stool samples) native stool community (Native Stool)

528 and pooled native stool community suspended in nucleotide stabilization reagent (Native Stool in

529 DNA Shield) using each of four commercial DNA extraction kits (Mo Bio, QIAamp, ZR Fecal

530 and ZymoBIOMICS). Three of each sample type are represented.

531

532 **Figure 7. Relative composition of microbial communities in pooled native stool samples**

533 **with and without stabilization reagent.** Weighted UniFrac of distance between native stool

534 samples colored by A) Sample Type with (dark blue) or without (light blue) DNA/RNA Shield



535 B) Extraction Kit and C) Boxplot of the weighted UniFrac distance between Native Stool w/  
536 DNA Shield samples and Native Stool w/o DNA Shield samples, separated by DNA Extraction  
537 Kit.

538

539 **Figure 8. Relative abundance of taxa in pooled native stool.** Relative proportions of taxa are  
540 shown at the order level for pooled native stool samples with (NatwSh) or without (Nat) pre-  
541 incubation in nucleotide stabilization reagent for each extraction kit. \*Significantly enriched in  
542 samples without DNA shield. +Significantly enriched in samples with DNA shield.

543

## 544 **DECLARATIONS**

### 545 **Ethics approval and consent to participate**

546 The institutional review board of the University of California, Davis approved this study and all  
547 participants provided written informed consent (clinicaltrials.gov registration number  
548 NCT02298725).

549

### 550 **Consent for publication**

551 Not applicable

552

### 553 **Availability of data and material**

554 All 16S rRNA sequences used in this analysis were deposited in the Qiita database  
555 (<https://qiita.ucsd.edu>) under study ID 11427 and in the European Nucleotide Archive (ENA)  
556 under accession number ERP104979.

557

558 **Competing interests**

559 The authors declare that they have no competing interests.

560

561 **Funding**

562 Research reported in this publication was supported in part by a grant from the National Dairy  
563 Council and the Campbell Soup Company and the USDA Agricultural Research Service project  
564 numbers 2032-51000-001-00D and and 2032-51530-022-00D.

565

566 **Authors' contributions**

567 RH performed bioinformatics analyses and together with MEK wrote the main text of the  
568 manuscript. ZA performed DNA extraction, PCR, compiled data and contributed to writing the  
569 methods section. NK designed and managed the human study which provided stools for these  
570 analyses and provided editorial input for the manuscript.

571

572 **Acknowledgements**

573 The authors would like to acknowledge Dr. Maria L. Marco for contributing support and  
574 ideas to this project. We would additionally like to thank Dr. Benjamin Callahan for his  
575 assistance in understanding DADA2 and diagnosing contaminant sequences in our dataset.

576 Mention of trade names or commercial products in this publication is solely for the  
577 purpose of providing specific information and does not imply recommendation or endorsement  
578 by the U.S. Department of Agriculture. USDA is an equal opportunity provider and employer.

579

580 **REFERENCES**

- 581 1. Manor, O. and E. Borenstein, *Systematic Characterization and Analysis of the Taxonomic*  
582 *Drivers of Functional Shifts in the Human Microbiome*. Cell Host Microbe, 2017. **21**(2):  
583 p. 254-267.
- 584 2. Lloyd-Price, J., et al., *Strains, functions and dynamics in the expanded Human*  
585 *Microbiome Project*. Nature, 2017. **550**(7674): p. 61-66.
- 586 3. Howard, M.M., T.H. Bell, and J. Kao-Kniffin, *Soil microbiome transfer method affects*  
587 *microbiome composition, including dominant microorganisms, in a novel environment*.  
588 FEMS Microbiol Lett, 2017. **364**(11).
- 589 4. Oliverio, A.M., M.A. Bradford, and N. Fierer, *Identifying the microbial taxa that*  
590 *consistently respond to soil warming across time and space*. Glob Chang Biol, 2017.  
591 **23**(5): p. 2117-2129.
- 592 5. Ward, C.S., et al., *Annual community patterns are driven by seasonal switching between*  
593 *closely related marine bacteria*. ISME J, 2017. **11**(6): p. 1412-1422.
- 594 6. Neave, M.J., et al., *Endozoicomonas genomes reveal functional adaptation and plasticity*  
595 *in bacterial strains symbiotically associated with diverse marine hosts*. Sci Rep, 2017. **7**:  
596 p. 40579.
- 597 7. Lemas, D.J., et al., *Alterations in human milk leptin and insulin are associated with early*  
598 *changes in the infant intestinal microbiome*. Am J Clin Nutr, 2016. **103**(5): p. 1291-300.
- 599 8. Noble, E.E., et al., *Early-Life Sugar Consumption Affects the Rat Microbiome*  
600 *Independently of Obesity*. J Nutr, 2017. **147**(1): p. 20-28.
- 601 9. Zielińska, S., et al., *The choice of the DNA extraction method may influence the outcome*  
602 *of the soil microbial community structure analysis*. MicrobiologyOpen, 2017.

- 603 10. Lozupone, C.A., et al., *Meta-analyses of studies of the human microbiota*. Genome Res,  
604 2013. **23**(10): p. 1704-14.
- 605 11. Aird, D., et al., *Analyzing and minimizing PCR amplification bias in Illumina sequencing*  
606 *libraries*. Genome biology, 2011. **12**(2): p. R18.
- 607 12. Schirmer, M., et al., *Insight into biases and sequencing errors for amplicon sequencing*  
608 *with the Illumina MiSeq platform*. Nucleic acids research, 2015. **43**(6): p. e37-e37.
- 609 13. Sinha, R., et al., *Assessment of variation in microbial community amplicon sequencing by*  
610 *the Microbiome Quality Control (MBQC) project consortium*. Nat Biotechnol, 2017.
- 611 14. Konstantinidis, K.T. and J.M. Tiedje, *Genomic insights that advance the species*  
612 *definition for prokaryotes*. Proceedings of the National Academy of Sciences of the  
613 United States of America, 2005. **102**(7): p. 2567-2572.
- 614 15. Nguyen, N.-P., et al., *A perspective on 16S rRNA operational taxonomic unit clustering*  
615 *using sequence similarity*. npj Biofilms and Microbiomes, 2016. **2**: p. 16004.
- 616 16. Schloss, P.D. and S.L. Westcott, *Assessing and improving methods used in operational*  
617 *taxonomic unit-based approaches for 16S rRNA gene sequence analysis*. Appl Environ  
618 Microbiol, 2011. **77**(10): p. 3219-26.
- 619 17. Kopylova, E., et al., *Open-Source Sequence Clustering Methods Improve the State Of the*  
620 *Art*. mSystems, 2016. **1**(1).
- 621 18. Tikhonov, M., R.W. Leach, and N.S. Wingreen, *Interpreting 16S metagenomic data*  
622 *without clustering to achieve sub-OTU resolution*. The ISME journal, 2015. **9**(1): p. 68.
- 623 19. Edgar, R.C., *UNOISE2: improved error-correction for Illumina 16S and ITS amplicon*  
624 *sequencing*. bioRxiv, 2016: p. 081257.

- 625 20. Callahan, B.J., et al., *DADA2: High-resolution sample inference from Illumina amplicon*  
626 *data*. Nat Methods, 2016. **13**(7): p. 581-3.
- 627 21. Amir, A., et al., *Deblur Rapidly Resolves Single-Nucleotide Community Sequence*  
628 *Patterns*. mSystems, 2017. **2**(2).
- 629 22. Eren, A.M., et al., *Minimum entropy decomposition: unsupervised oligotyping for*  
630 *sensitive partitioning of high-throughput marker gene sequences*. ISME J, 2015. **9**(4): p.  
631 968-79.
- 632 23. Rosen, M.J., et al., *Denoising PCR-amplified metagenome data*. BMC bioinformatics,  
633 2012. **13**(1): p. 283.
- 634 24. Edgar, R.C., *Accuracy of microbial community diversity estimated by closed- and open-*  
635 *reference OTUs*. PeerJ, 2017. **5**: p. e3889.
- 636 25. Callahan, B.J., P.J. McMurdie, and S.P. Holmes, *Exact sequence variants should replace*  
637 *operational taxonomic units in marker gene data analysis*. bioRxiv, 2017: p. 113597.
- 638 26. Vishnivetskaya, T.A., et al., *Commercial DNA extraction kits impact observed microbial*  
639 *community composition in permafrost samples*. FEMS microbiology ecology, 2014.  
640 **87**(1): p. 217-230.
- 641 27. Bahl, M.I., A. Bergström, and T.R. Licht, *Freezing fecal samples prior to DNA extraction*  
642 *affects the Firmicutes to Bacteroidetes ratio determined by downstream quantitative PCR*  
643 *analysis*. FEMS microbiology letters, 2012. **329**(2): p. 193-197.
- 644 28. Guo, F. and T. Zhang, *Biases during DNA extraction of activated sludge samples*  
645 *revealed by high throughput sequencing*. Applied microbiology and biotechnology, 2013.  
646 **97**(10): p. 4607-4616.

- 647 29. Garcia-Mazcorro, J.F., et al., *Influence of whole-wheat consumption on fecal microbial*  
648 *community structure of obese diabetic mice*. PeerJ, 2016. **4**: p. e1702.
- 649 30. Plante, C.J. and S. Stinson, *Recolonization and cues for bacterial migration into mock<sup>1</sup>*  
650 *deposit-feeder fecal casts*. Aquatic microbial ecology, 2003. **33**(2): p. 107-115.
- 651 31. Kable, M.E., et al., *The Core and Seasonal Microbiota of Raw Bovine Milk in Tanker*  
652 *Trucks and the Impact of Transfer to a Milk Processing Facility*. MBio, 2016. **7**(4).
- 653 32. Caporaso, J.G., et al., *Global patterns of 16S rRNA diversity at a depth of millions of*  
654 *sequences per sample*. Proceedings of the National Academy of Sciences, 2011.  
655 **108**(Supplement 1): p. 4516-4522.
- 656 33. Hamady, M., et al., *Error-correcting barcoded primers for pyrosequencing hundreds of*  
657 *samples in multiplex*. Nature methods, 2008. **5**(3): p. 235-237.
- 658 34. Bokulich, N.A., et al., *Next-generation sequencing reveals significant bacterial diversity*  
659 *of botrytized wine*. PloS one, 2012. **7**(5): p. e36357.
- 660 35. Caporaso, J.G., et al., *QIIME allows analysis of high-throughput community sequencing*  
661 *data*. Nature methods, 2010. **7**(5): p. 335-336.
- 662 36. Edgar, R.C., *Search and clustering orders of magnitude faster than BLAST*.  
663 Bioinformatics, 2010. **26**(19): p. 2460-2461.
- 664 37. DeSantis, T.Z., et al., *Greengenes, a chimera-checked 16S rRNA gene database and*  
665 *workbench compatible with ARB*. Applied and environmental microbiology, 2006. **72**(7):  
666 p. 5069-5072.
- 667 38. Segata, N., et al., *Metagenomic biomarker discovery and explanation*. Genome biology,  
668 2011. **12**(6): p. R60.

- 669 39. Li, K., et al., *Analyses of the microbial diversity across the human microbiome*. PloS one,  
670 2012. **7**(6): p. e32118.
- 671 40. Eren, A.M., et al., *Oligotyping: differentiating between closely related microbial taxa*  
672 *using 16S rRNA gene data*. Methods in Ecology and Evolution, 2013. **4**(12): p. 1111-  
673 1119.
- 674 41. Leite, F.L., et al., *Comparison of fecal DNA extraction kits for the detection of*  
675 *Mycobacterium avium subsp. paratuberculosis by polymerase chain reaction*. Journal of  
676 veterinary diagnostic investigation, 2013. **25**(1): p. 27-34.
- 677 42. Ruggieri, J., et al., *Techniques for Nucleic Acid Purification from Plant, Animal, and*  
678 *Microbial Samples*. Sample Preparation Techniques for Soil, Plant, and Animal Samples,  
679 2016: p. 41-52.
- 680 43. Nechvatal, J.M., et al., *Fecal collection, ambient preservation, and DNA extraction for*  
681 *PCR amplification of bacterial and human markers from human feces*. Journal of  
682 microbiological methods, 2008. **72**(2): p. 124-132.

683

OTUs/Variants

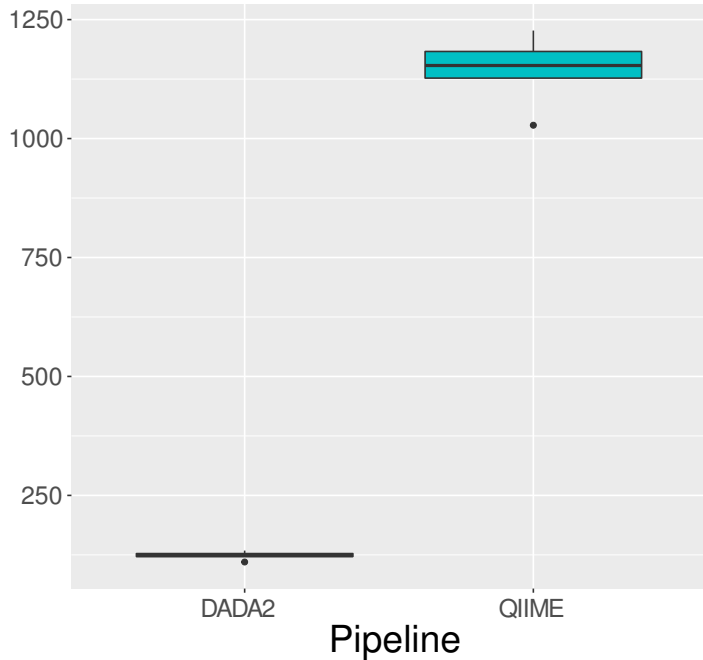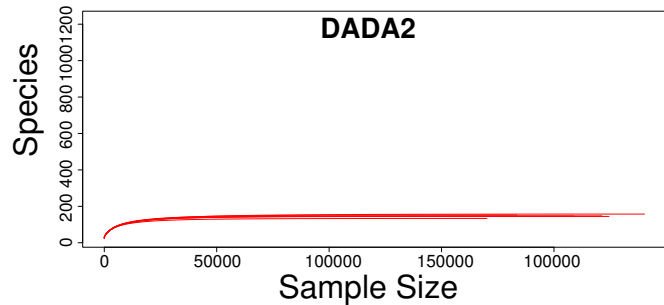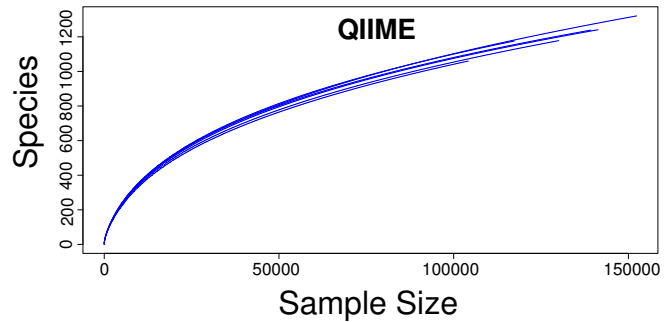



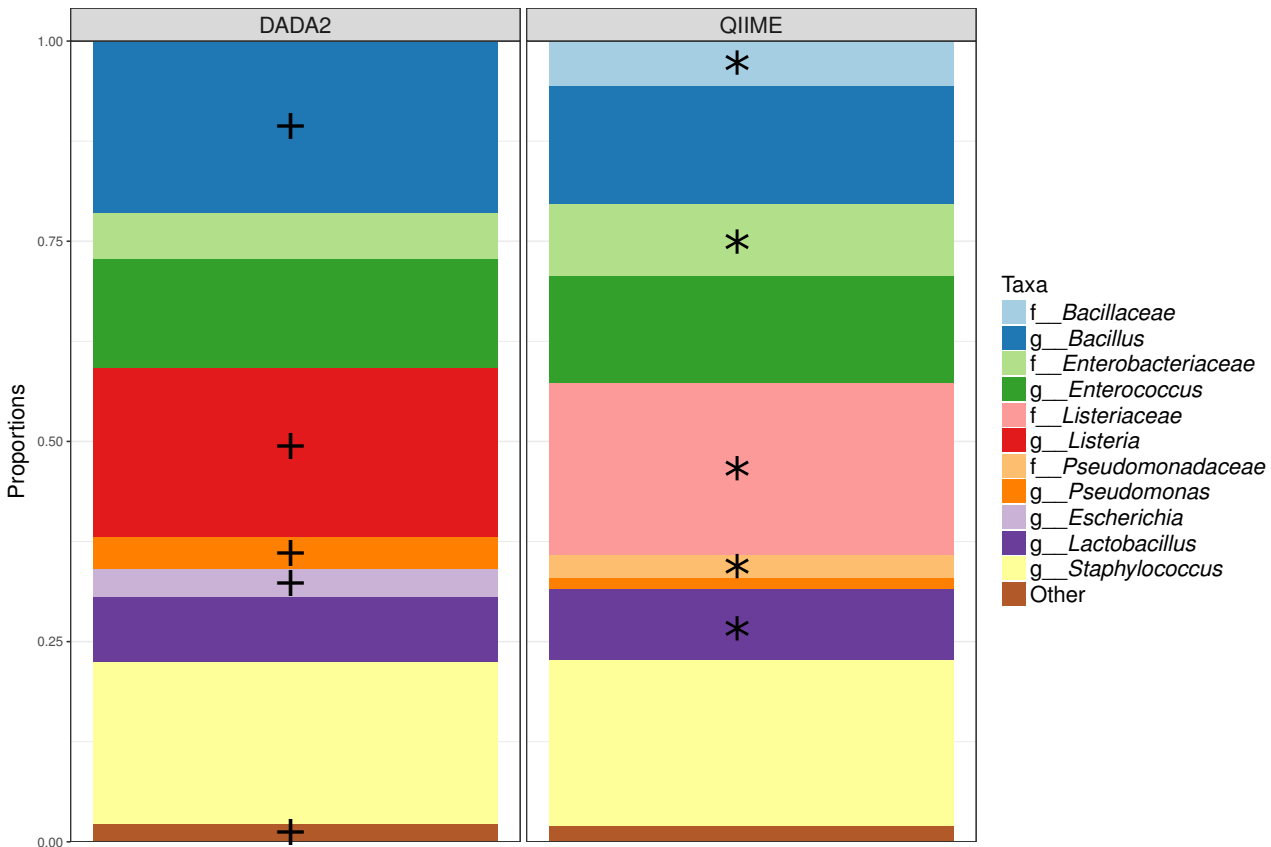

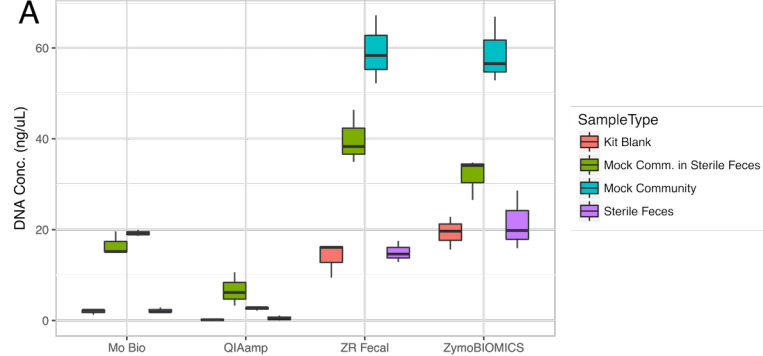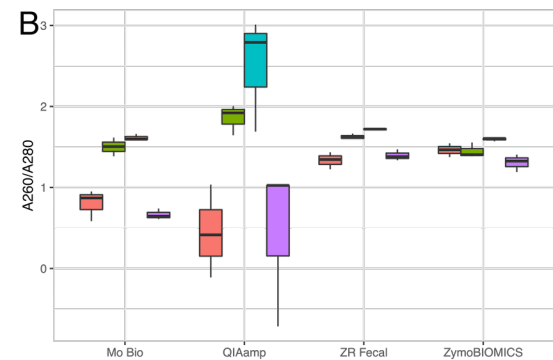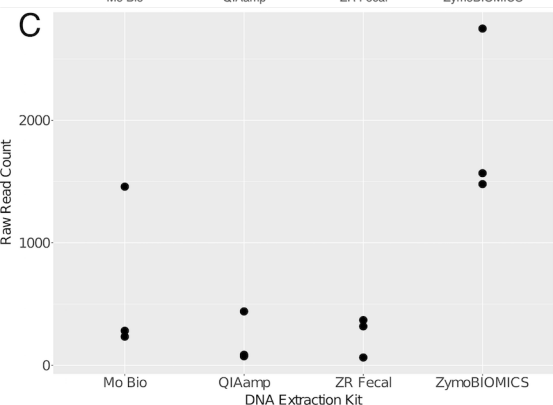

**A**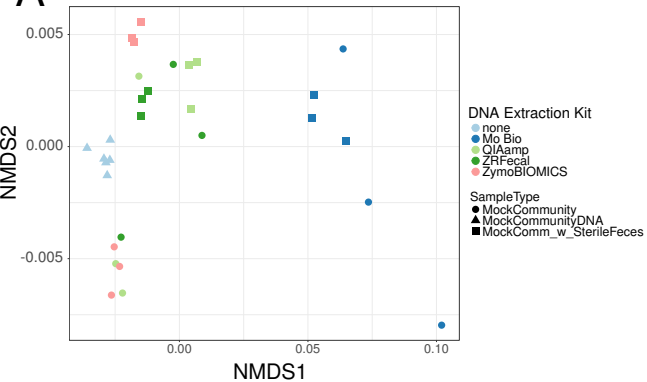**B**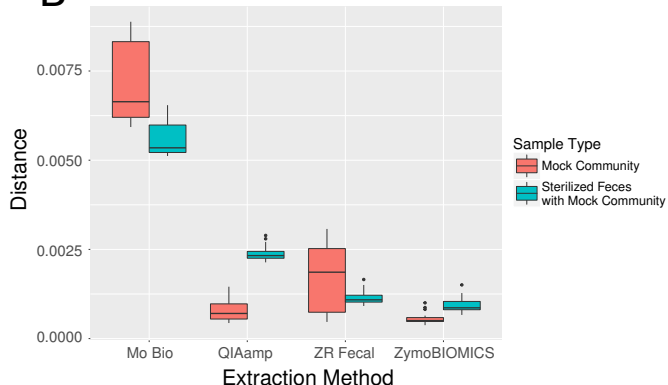

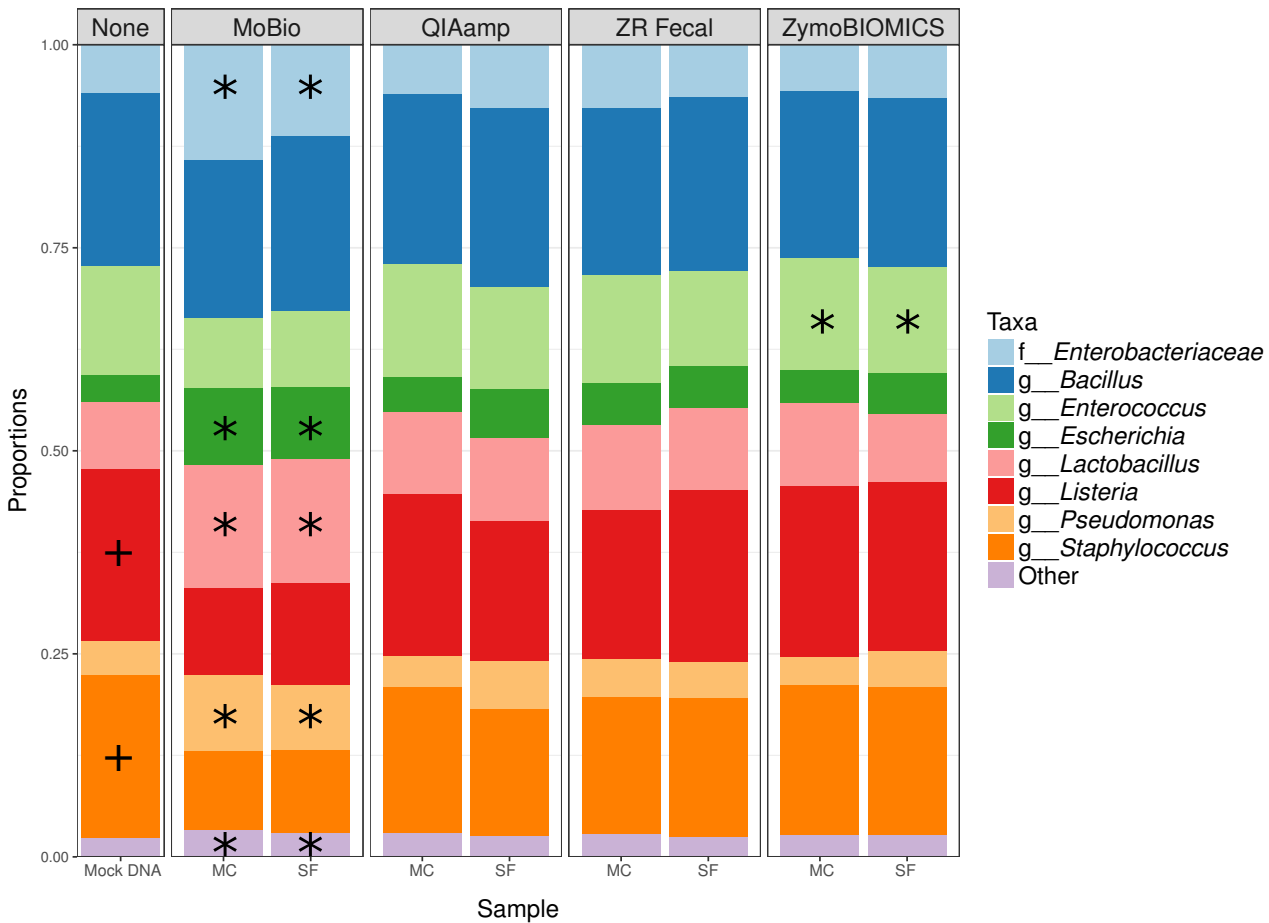

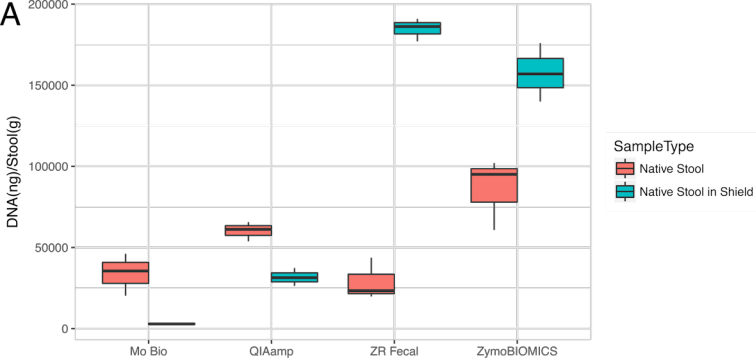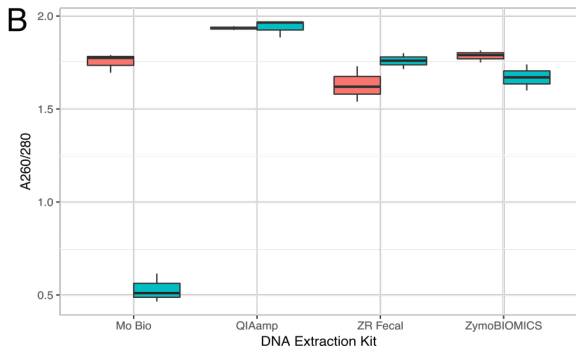

**A**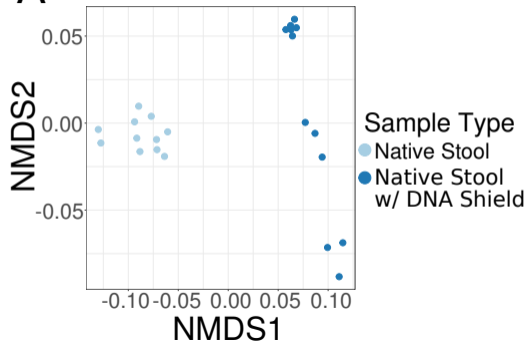**B**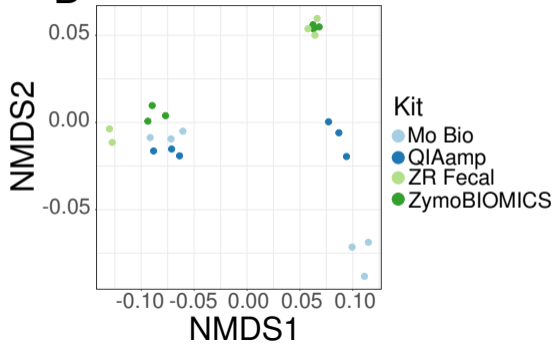**C**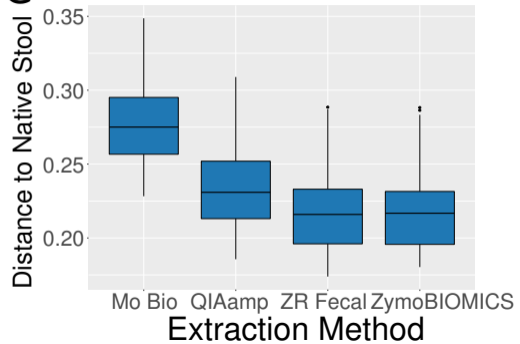

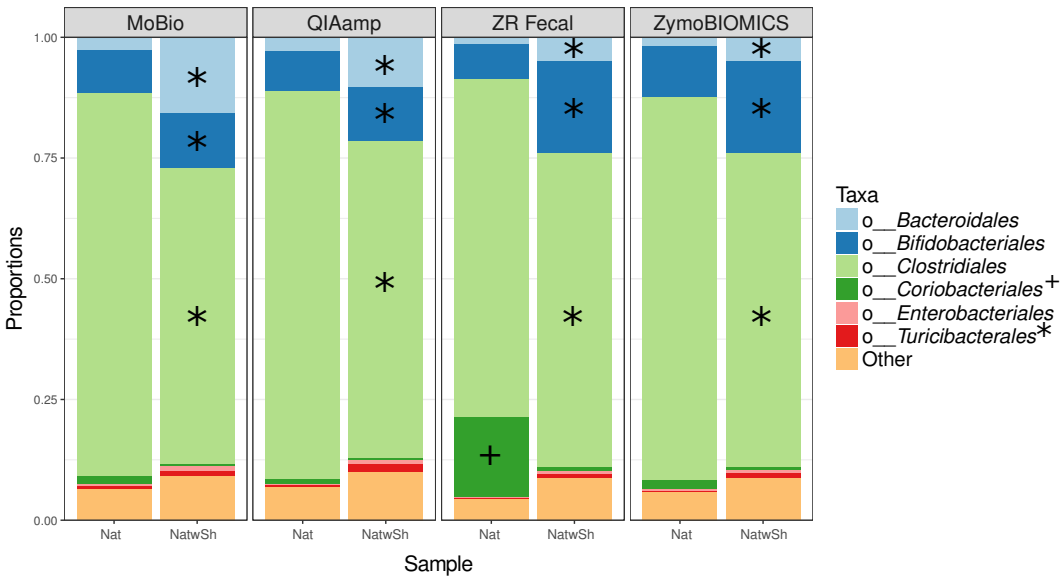

Source: https://www.biorxiv.org/content/10.1101/212134v1.full.pdf
